# Supplementary material for: Early oral protein-containing diets following elective lower gastrointestinal tract surgery in adults: a meta-analysis of randomized clinical trials
Source: PubMed Central journal article supplement (PMC7986268; doi:10.1186/s13741-021-00179-3), 2021-03-23
Supplement: 13741_2021_179_MOESM1_ESM.pdf [file 13741_2021_179_MOESM1_ESM.pdf]

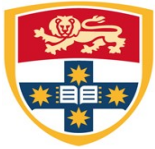

THE UNIVERSITY OF  
**SYDNEY**

**Online-Only Supplement:**

**Early oral protein-containing diets following elective  
lower gastrointestinal tract surgery in adults:  
A meta-analysis of randomized controlled trials.**

Hong PU<sup>a,b</sup> (蒲虹), Philippa T. Heighes<sup>a</sup> and Gordon S. Doig<sup>a</sup>

From the <sup>a</sup>Northern Clinical School Intensive Care Research Unit, Faculty of Medicine and Health, University of Sydney, Australia and <sup>b</sup>Department of Critical Care Medicine, West China Hospital of Sichuan University, Chengdu, Peoples Republic of China.

**Corresponding Author:**

Dr. Gordon S. Doig,  
Northern Clinical School Intensive Care Research Unit,  
Faculty of Medicine and Health,  
Kolling Building – RNSH  
Pacific Hwy,  
St Leonards  
Australia 2065  
Gordon.Doig@EvidenceBased.net  
[www.EvidenceBased.net/Research](http://www.EvidenceBased.net/Research)

16 Dec 2020

---

© 2020 Gordon S Doig, University of Sydney. All rights reserved. This publication is protected by copyright. No part of it may be reproduced for commercial purposes or distributed electronically without prior written permission of the publisher. Reproduction for personal or educational use is acceptable.

---

## Contents

|                                                                               |    |
|-------------------------------------------------------------------------------|----|
| Title Page.....                                                               | 1  |
| PubMed, Embase and CNKI search terms.....                                     | 4  |
| PubMed search terms: .....                                                    | 4  |
| Embase search terms: .....                                                    | 4  |
| China National Knowledge Infrastructure search terms:.....                    | 5  |
| eTable 1: RCTs excluded after detailed review.....                            | 6  |
| eFigure 1. Risk of bias summary figure. ....                                  | 12 |
| eFigure 2. Funnel plot for publication bias. Primary outcome (mortality)..... | 13 |
| eFigure 3: Duration of hospital stay.....                                     | 13 |
| eFigure 4: Need for ICU admission .....                                       | 13 |
| eFigure 5: Anastomotic leak/dehiscence.....                                   | 13 |
| eFigure 6: Postoperative nausea and vomiting .....                            | 14 |
| eFigure 7: Pneumonia .....                                                    | 14 |
| eFigure 8: Need for re-operation.....                                         | 14 |
| eFigure 9: Number of patients with intra-abdominal abscess/peritonitis .....  | 14 |
| eFigure 10: Number of patients with serious post-operative complications..... | 15 |
| eFigure 11: Number of patients with a post-operative infection.....           | 15 |
| eFigure 12: Stratified analysis of duration of hospital stay .....            | 16 |
| Reference List.....                                                           | 17 |

## PubMed, Embase and CNKI search terms

### PubMed search terms:

The MEDLINE subject heading terms used to identify the nutritional support literature included:

nutrition therapy [MeSH terms] or nutritional support [MeSH terms] or nutrition phenomena [MeSH terms] or nutrition processes [MeSH terms] or nutrition disorders [MeSH terms] or nutrition assessment [MeSH terms]

These nutrition related terms were crossed with MEDLINE terms to restrict the results to RCTs conducted in patients undergoing large bowel surgery:

("lower gastrointestinal tract"[MeSH Terms] OR ("lower"[All Fields] AND "gastrointestinal"[All Fields] AND "tract"[All Fields]) OR "lower gastrointestinal tract"[All Fields]) OR ("intestine, large"[MeSH Terms] OR ("intestine"[All Fields] AND "large"[All Fields]) OR "large intestine"[All Fields] OR ("large"[All Fields] AND "bowel"[All Fields]) OR "large bowel"[All Fields]) OR ("colectomy"[MeSH Terms] OR "colectomy"[All Fields]) OR (("colostomy"[MeSH Terms] OR "colostomy"[All Fields]) AND colorectal[All Fields]) OR ("colon"[MeSH Terms] OR "colon"[All Fields]) OR ("administration, rectal"[MeSH Terms] OR ("administration"[All Fields] AND "rectal"[All Fields]) OR "rectal administration"[All Fields] OR "rectal"[All Fields]) OR ("rectum"[MeSH Terms] OR "rectum"[All Fields])

AND

("surgery"[Subheading] OR "surgery"[All Fields] OR "surgical procedures, operative"[MeSH Terms] OR ("surgical"[All Fields] AND "procedures"[All Fields] AND "operative"[All Fields]) OR "operative surgical procedures"[All Fields] OR "surgery"[All Fields] OR "general surgery"[MeSH Terms] OR ("general"[All Fields] AND "surgery"[All Fields]) OR "general surgery"[All Fields]) OR ("surgical procedures, operative"[MeSH Terms] OR ("surgical"[All Fields] AND "procedures"[All Fields] AND "operative"[All Fields]) OR "operative surgical procedures"[All Fields] OR "surgical"[All Fields]) OR operat\$[All Fields] OR postoperati\$[all]

AND broad MeSH terms to identify RCTs:

((clinical[Title/Abstract] AND trial[Title/Abstract]) OR clinical trials as topic[MeSH Terms] OR clinical trial[Publication Type] OR random\*[Title/Abstract] OR random allocation[MeSH Terms] OR therapeutic use[MeSH Subheading])

### Embase search terms:

The EMTREE terms used to identify the nutritional support literature included:

diet therapy/ or nutritional support/ or nutritional disorder/ or nutritional assessment/ or nutritional deficiency/ or feeding behaviour/ or nutritional status/ or overnutrition/

These nutrition related terms were crossed with EMTREE terms to restrict the results to RCTs conducted in large bowel surgery patients:

(random or clinical trial or randomised or randomized or randomized controlled trial or randomised controlled trial).mp

AND

*(surgery or surgical or operat\$ or post-operat\$ or postoperat\$).tw*

AND

*(lower gastrointestinal or large bowel or colectomy or colostomy or colorectal or colon or rectal or rectum).tw*

*China National Knowledge Infrastructure search terms:*

The CNKI subject heading terms used to identify the nutritional support literature included:

营养生理学现象 or 营养疗法 or 营养支持 or 营养状况 or 营养评价 or 肠道营养 or 营养需要 or 胃肠外营养 or 胃肠外营养, 全 or 营养价值

AND

结肠切除术 or 直肠结肠切除术, 重建性 or 结肠造口术

AND

随机分配 or 随机对照试验 or 临床试验

eTable 1: RCTs excluded after detailed review.

| Study                           | Patient population                                                                                                                            | Protocol specified early nutrition intervention                                                                                                                                                                                                                                                                                                                                                                                                                                                            | Reasons for exclusion                                                                                           |
|---------------------------------|-----------------------------------------------------------------------------------------------------------------------------------------------|------------------------------------------------------------------------------------------------------------------------------------------------------------------------------------------------------------------------------------------------------------------------------------------------------------------------------------------------------------------------------------------------------------------------------------------------------------------------------------------------------------|-----------------------------------------------------------------------------------------------------------------|
| Boelens <sup>1</sup><br>2014    | Major rectal surgery                                                                                                                          | POD 1: on the day of surgery (day 0), 8 hours after ending the surgical procedure, <b>enteral nutrition (Nutrison Protein Plus Multi Fibre, Nutricia)</b> was started at 500 mL/24 hours. The next day (day 1 postoperative), at 8 o'clock in the morning, the continuous infusion was increased to 1 L/24 hours; on day 2, the infusion was increased to 2 L/24 hours.<br><b>Early EN compared to early PN (Kabiven Central with Dipeptiven, Fresenius Kabi)</b> . PN protocol same as EN protocol above. | Mortality not explicitly reported.<br>Both groups received early protein.                                       |
| Behrns <sup>2</sup><br>2000     | Elective intestinal surgery.                                                                                                                  | <b>Clear liquid diet</b> commenced on POD 2.                                                                                                                                                                                                                                                                                                                                                                                                                                                               | No early protein.                                                                                               |
| Binderow <sup>3</sup><br>1994   | Elective laparotomy with either a colonic or ileal resection.                                                                                 | <b>Regular solid food</b> on morning of POD 1.                                                                                                                                                                                                                                                                                                                                                                                                                                                             | Mortality not explicitly reported.                                                                              |
| Cao <sup>4</sup><br>2009        | Postoperative colorectal cancer.                                                                                                              | POD 1: <b>Began 5% Glucose</b> 500ml; POD 2: Enteral nutrition (Peptison, NUTRICIA) 500ml and 5% Glucose injection 500ml; POD 3: Peptison 500ml to 1500ml on the third POD, progressed to Peptison 100ml/h on the fourth to seventh POD.                                                                                                                                                                                                                                                                   | No early protein.                                                                                               |
| Chatterjee <sup>5</sup><br>2012 | Gastrointestinal anastomosis and uncomplicated simple biliary-enteric anastomosis (choledochoduodenostomy) on an emergency or elective basis. | <b>"Oral liquids"</b> (25ml/hr) were started within 24 hours of operation in group A with clamping the NGT.                                                                                                                                                                                                                                                                                                                                                                                                | Early protein <i>possible</i> , but not explicit in protocol. 'Oral liquids' protein content not described.     |
| Chen <sup>6</sup><br>2015       | Surgery for colorectal cancer.                                                                                                                | <b>Water</b> was started on POD 1, water and a small amount of EN was taken repeatedly on POD 2. 1L of EN was taken repeatedly on POD 3 followed by a small amount of liquid food.                                                                                                                                                                                                                                                                                                                         | No early protein.<br>Mortality not explicitly reported.                                                         |
| Chen <sup>7</sup><br>2010       | Surgery for colorectal cancer.                                                                                                                | <b>Liquid diet</b> was began within 24 hours after surgery, and then gradually continued to solid diet.                                                                                                                                                                                                                                                                                                                                                                                                    | Mortality not explicitly reported.                                                                              |
| Da Fonseca <sup>8</sup><br>2011 | Colorectal resections.                                                                                                                        | <b>'Oral liquid diet'</b> commenced on POD 1.                                                                                                                                                                                                                                                                                                                                                                                                                                                              | Early protein <i>possible</i> , but not explicit in protocol. 'Oral liquid diet' protein content not described. |

|                                  |                                                                                                                          |                                                                                                                                                                                                                                                                                                                                                                           |                                                                                                               |
|----------------------------------|--------------------------------------------------------------------------------------------------------------------------|---------------------------------------------------------------------------------------------------------------------------------------------------------------------------------------------------------------------------------------------------------------------------------------------------------------------------------------------------------------------------|---------------------------------------------------------------------------------------------------------------|
| Dag <sup>9</sup><br>2011         | Colorectal surgery                                                                                                       | Postoperative oral feeding commencing approximately 12 hours after the operation with a “fluid diet”.                                                                                                                                                                                                                                                                     | Early protein <i>possible</i> , but not explicit in protocol. ‘Fluid diet’ protein content not described.     |
| Delaney <sup>10</sup><br>2003    | Patients scheduled for elective segmental intestinal or rectal resection by laparotomy.                                  | On Postoperative Day (POD) 1, patients were encouraged to walk at least one circuit of the nursing floor (approximately 60 meters) up to five times, to sit out of bed between walks, and to do regular incentive spirometry. They were allowed <b>noncarbonated liquids <i>ad libitum</i></b> and were offered <b>solid food</b> that evening if tolerating oral fluids. | Mortality not explicitly reported.                                                                            |
| El Nakeeb <sup>11</sup><br>2009  | Elective colonic anastomosis.                                                                                            | Patients began <b>fluids</b> on the first postoperative day and advanced to a <b>regular diet</b> within the next 24–48 h, as tolerated (indicated by an absence of vomiting or abdominal distension).                                                                                                                                                                    | Early protein <i>possible</i> , but not explicit in protocol. ‘Fluids’ protein content not described.         |
| Feo <sup>12</sup><br>2004        | Colorectal resection.                                                                                                    | Patients were ‘ <b>allowed to drink</b> ’ the day after the operation, eat a <b>soft diet</b> the following day regardless of the passage of flatus, and were then advanced to solid food as tolerated.                                                                                                                                                                   | Early protein <i>possible</i> , but not explicit in protocol. ‘Fluids’ protein content not described.         |
| Han <sup>13</sup><br>2012        | Surgery for colorectal cancer.                                                                                           | <b>Liquid diet</b> was begun within 6-8 hours.                                                                                                                                                                                                                                                                                                                            | Mortality not explicitly reported.                                                                            |
| Han-Geurts <sup>14</sup><br>2001 | Elective abdominal surgery including open colonic surgery and transabdominal central vascular reconstruction procedures. | Patients were assigned to a patient-controlled (PC) diet after surgery of a fixed regimen (FR). Patients in the PC group chose when to start an oral diet. <b>There was no motivation to start early.</b> Patients in the FR group started water on POD 0 and 1. On POD 2 a ‘liquid diet’ was commenced. Liquid diet was defined as water, tea, coffee, lemonade.         | No early protein.                                                                                             |
| Han-Geurts <sup>15</sup><br>2007 | Elective open colorectal or abdominal vascular surgery.                                                                  | Patients were assigned to a conventional dietary regimen or a diet of their own choice. <b>There was no motivation to start early.</b> Patients in the conventional diet group started water on POD 0 and 1. POD 2 and 3, they continued with a ‘liquid diet’ defined as water, tea, coffee and lemonade.                                                                 | No early protein.                                                                                             |
| Hartsell <sup>16</sup><br>1997   | Elective colorectal surgery.                                                                                             | Commence ‘ <b>liquid diet</b> ’ on POD 1, advance to regular diet when they consumed 1L in 24 h.                                                                                                                                                                                                                                                                          | Early protein <i>possible</i> , but not explicit in protocol. Protein content of ‘liquid diet’ not described. |
| He <sup>17</sup><br>2016         | Elective resection for colorectal carcinoma.                                                                             | <b>Water</b> was begun on POD 1, followed by 500ml of enteral nutrition on POD 2.                                                                                                                                                                                                                                                                                         | No early protein.<br>Mortality not explicitly reported.                                                       |

|                              |                                                                         |                                                                                                                                                                                                                                                                                                                                                                                                                                                                              |                                                                                                                                                                                                    |
|------------------------------|-------------------------------------------------------------------------|------------------------------------------------------------------------------------------------------------------------------------------------------------------------------------------------------------------------------------------------------------------------------------------------------------------------------------------------------------------------------------------------------------------------------------------------------------------------------|----------------------------------------------------------------------------------------------------------------------------------------------------------------------------------------------------|
| Hoover <sup>18</sup><br>2000 | Extensive esophageal, gastroduodenal, biliary or pancreatic procedures. | Immediate post-op elemental diet via jejunostomy catheter vs. IV glucose.                                                                                                                                                                                                                                                                                                                                                                                                    | Not lower GI tract surgery. Mortality not explicitly reported.                                                                                                                                     |
| Kemen <sup>19</sup><br>1995  | Upper GI malignancies.                                                  | On POD 1, patients were randomized to receive either the arginine, RNA, and omega-3 fatty acids supplemented diet or an isocaloric and isonitrogenous placebo diet.                                                                                                                                                                                                                                                                                                          | Not lower GI tract surgery. Both groups received early protein.                                                                                                                                    |
| Lee <sup>20</sup><br>2011    | Laparoscopic colon surgery.                                             | Patients were allowed to take water (less than 1 L) immediately after the operation. They progressed to <b>semifluid diet</b> on POD 1 and commenced a regular diet in 2 days after surgery.                                                                                                                                                                                                                                                                                 | Early protein <i>possible</i> , but not explicit in protocol. Protein content of 'semifluid diet' not described.                                                                                   |
| Li <sup>21</sup><br>2006     | Postoperative colorectal cancer                                         | POD 1: <b>Began 5% Glucose 500ml through jejunostomy tube</b> ; POD 2: Enteral Nutrition (Peptison, NUTRICIA) 1500ml to 2000ml and continued until POD 7.                                                                                                                                                                                                                                                                                                                    | No early protein.                                                                                                                                                                                  |
| Lidder <sup>22</sup><br>2013 | Colorectal surgery.                                                     | Pre-op carbohydrate and Post-op protein drink (factorial design). In the postoperative period patients were given polymeric nutritional supplement drink or placebo (600 ml/day) from the period immediately after their operation until discharge. Patients in the supplement group consumed Fortifresh (Numico, Zoetermeer, the Netherlands). All patients received <b>"free fluids permitted immediately after surgery and a light diet as tolerated by the patient."</b> | Both groups received early protein. This trial compares 'standard' early protein (light diet from POD 1) to 'standard' early protein (light diet from POD 1) <i>plus</i> protein supplement drink. |
| Lucha <sup>23</sup><br>2005  | Elective open GI surgery. Over half procedures were lower GI.           | Early management consisted of bowel rest for 8 hours after completion of surgery followed by a <b>regular diet</b> . Traditional management consisted of bowel rest until the passage of flatus, followed by 24 hours of clear liquids and advancement to a regular diet.                                                                                                                                                                                                    | Mortality not explicitly reported.                                                                                                                                                                 |
| MacFie <sup>24</sup><br>2000 | Majority colorectal (94%)                                               | Pre-op carbohydrate and Post-op protein drink (factorial design). On POD 1, patients were randomized to normal diet or normal diet plus protein supplement drink (Fortisip, Nutricia Ltd., Towbridge, Wiltshire, UK).                                                                                                                                                                                                                                                        | Both groups received early protein. This trial compares 'normal' early protein (normal diet from POD 1) to 'normal' early protein (normal diet from POD 1) <i>plus</i> protein supplement drink.   |



|                                        |                                                                        |                                                                                                                                                                                                                                                                                                                                                                      |                                                                                                                                                                                                                        |
|----------------------------------------|------------------------------------------------------------------------|----------------------------------------------------------------------------------------------------------------------------------------------------------------------------------------------------------------------------------------------------------------------------------------------------------------------------------------------------------------------|------------------------------------------------------------------------------------------------------------------------------------------------------------------------------------------------------------------------|
| Nematihonar <sup>25</sup><br>2018      | Colorectal anastomosis.                                                | Early feeding after surgery was initiated by <b>filtrate liquids</b> within 24 h after surgery. Over the next 24 h, the liquid diet was replaced by a normal diet in case tolerance was desirable.                                                                                                                                                                   | Early protein <i>possible</i> , but not explicit in protocol. Protein content of 'filtrate liquids' not described. Normal diet introduced later than 24 h after surgery.                                               |
| Nessim <sup>26</sup><br>1999           | Patients without stoma who underwent anorectal reconstructive surgery. | Study intervention (bowel confinement) patients received a clear liquid diet with loperamide 4 mg by mouth three times per day for three days, with codeine phosphate 30 mg by mouth four times per day for three postoperative days after the operation. Patients in the regular diet group began a regular diet on the day of surgery.                             | Mortality not explicitly reported.                                                                                                                                                                                     |
| Reissman <sup>27</sup><br>1995         | Elective colorectal surgery with bowel resection.                      | Patients in the early feeding group began a <b>clear liquid diet</b> on the first postoperative day and advanced to a regular diet within the next 24 to 48 hours, as tolerated (absence of vomiting or abdominal distention). Control group received NPO until resolution of ileus.                                                                                 | No early protein.                                                                                                                                                                                                      |
| Pragatheeswarane <sup>28</sup><br>2014 | Elective open bowel surgery.                                           | <b>Clear liquid</b> diet started at the 24 hour mark after surgery. Full fluid diet offered within 48 h and solid diet over next 24 h.                                                                                                                                                                                                                               | No early protein.                                                                                                                                                                                                      |
| Qu <sup>29</sup><br>2011               | Surgery for colorectal cancer.                                         | <b>Water</b> was began within 2 hours of surgery and then a small amount of <b>enteral nutrition</b> was began after 2 hours, with total amount less than 600ml.                                                                                                                                                                                                     | Mortality not explicitly reported.                                                                                                                                                                                     |
| Ren <sup>30</sup><br>2014              | Surgery for colorectal cancer.                                         | <b>Water</b> was began on POD 1, followed by water and 500ml of enteral nutrition on POD 2.                                                                                                                                                                                                                                                                          | Mortality not explicitly reported.<br>No early protein.                                                                                                                                                                |
| Ryan <sup>31</sup><br>1981             | Elective colectomy.                                                    | Early postoperative jejunal feeding (n=9) of <b>elemental diet</b> (Vivonex HN, 42 g/L protein) compared to intravenous isotonic glucose (n=7).                                                                                                                                                                                                                      | Mortality not explicitly reported.                                                                                                                                                                                     |
| Sagar <sup>32</sup><br>1979            | Major GI surgery. (>70% lower GI tract surgery)                        | Starting POD 1, for the first 24 hours <b>elemental solution</b> (Flexical) was infused at half strength solution at 25 ml/hour. Thereafter, undiluted Flexical was infused at 25 ml/hour on the second postoperative day, 50 ml/hour on the third postoperative day, and 100 ml/hour on the fourth and fifth days. Conventional patients received NPO for two days. | Mortality not explicitly reported.                                                                                                                                                                                     |
| Sharma <sup>33</sup><br>2013           | Colorectal surgery.                                                    | Standard Hospital Diet includes <b>free fluids</b> allowed immediately postoperatively with a <b>standard diet</b> offered to all the patients from day 1.<br>Patients were randomized to Standard Hospital Diet or Standard Hospital Diet plus protein drink supplements (Pro-Cal).                                                                                 | Both groups received early protein. This trial compares 'normal' early protein (standard hospital diet from POD 1) to 'normal' early protein (standard hospital diet from POD 1) <i>plus</i> protein supplement drink. |

|                                 |                                                                                                                    |                                                                                                                                                                                                                                                                                                                                                                                                                                                                                          |                                                                    |
|---------------------------------|--------------------------------------------------------------------------------------------------------------------|------------------------------------------------------------------------------------------------------------------------------------------------------------------------------------------------------------------------------------------------------------------------------------------------------------------------------------------------------------------------------------------------------------------------------------------------------------------------------------------|--------------------------------------------------------------------|
| Schroeder <sup>34</sup><br>1991 | Bowel resection. (>90% received lower GI tract procedures.)                                                        | On arrival back at the ward from the recovery room, the patient was assessed and immediate nasojejunal infusion with <b>full-strength Osmolite</b> (Ross Laboratories) at 50 mL/h via a continuous infusion pump was commenced. The control group received 5% dextrose plus oral fluids and food recommenced at the discretion of the clinical team, usually depended on the presence of bowel sounds and passage of flatus.                                                             | Mortality not explicitly reported.                                 |
| Smedley <sup>35</sup><br>2004   | Lower GI tract surgery.                                                                                            | Pre-op carbohydrate and Post-op protein drink (factorial design). <b>Protocol does not prescribe early normal diet or early protein drink intake.</b> All patients received standard postoperative care with commencement of free fluids and reintroduction of normal diet without interference by the study team or protocol. Patients randomized to standard diet plus supplement were encouraged to drink Fortisip (Nutricia) ad libitum in small, frequent quantities between meals. | No early protein.                                                  |
| Soliani <sup>36</sup><br>2001   | Major surgery of the abdomen and pelvis.                                                                           | Compares <b>early PN vs. early EN vs. early immunoenhanced EN.</b> No differences in time to receiving protein between groups (ePN, eEN and eEIN).                                                                                                                                                                                                                                                                                                                                       | All three groups received early protein.                           |
| Wang <sup>37</sup><br>2015      | Postoperative colorectal cancer.                                                                                   | <b>Water</b> was began on POD 1, followed by water and 500ml of <b>enteral nutrition</b> on POD 2                                                                                                                                                                                                                                                                                                                                                                                        | Mortality not explicitly reported.<br>No early protein.            |
| Wang <sup>38</sup><br>2013      | Postoperative colorectal cancer.                                                                                   | POD 1: <b>Began small amount of water orally</b> ; POD 2: progressed to Enteral Nutrition (Jevity, Abbott) 500 ml and water; POD 3: EN 1000 ml and Liquid diet on the third POD (Jevity, Abbott) 1000 ml , added Liquid diet on the fourth, and continued on the fifth POD .                                                                                                                                                                                                             | No early protein.                                                  |
| Wu <sup>39</sup><br>2007        | Malnourished patients undergoing elective GI cancer surgery (65% had gastrectomy, 35% had colon or rectal surgery) | Randomized to three groups: Commenced on POD 1, compares 1) control ( <b>5% and 10% glucose IV and later normal diet</b> ) vs. 2) <b>early EN</b> vs. 3) <b>early PN.</b>                                                                                                                                                                                                                                                                                                                | Mortality not explicitly reported for colorectal surgery patients. |
| Wu <sup>40</sup><br>1996        | Gastrointestinal disease surgery.                                                                                  | Randomized to three groups: Commenced on POD 1, compares 1) control ( <b>5% and 10% glucose IV and later normal diet</b> ) vs. 2) <b>early EN</b> vs. 3) <b>early PN.</b>                                                                                                                                                                                                                                                                                                                | Mortality not explicitly reported.<br>Abstract only.               |
| Wu <sup>41</sup><br>2000        | Gastrointestinal disease surgery.                                                                                  | Randomized to three groups: Commenced on POD 1, compares 1) control ( <b>5% and 10% glucose IV and later normal diet</b> ) vs. 2) <b>early EN</b> vs. 3) <b>early PN.</b>                                                                                                                                                                                                                                                                                                                | Mortality not explicitly reported.<br>Abstract only.               |

|                            |                                 |                                                                                                                                                                                                                                                                                                                     |                                                                                                                                                            |
|----------------------------|---------------------------------|---------------------------------------------------------------------------------------------------------------------------------------------------------------------------------------------------------------------------------------------------------------------------------------------------------------------|------------------------------------------------------------------------------------------------------------------------------------------------------------|
| Wu <sup>42</sup><br>2012   | Postoperative colorectal cancer | Started within 24 h of surgery: 500mls of <b>protein drink (Ensure, Abbott)</b> . POD 2: 1000 mls of protein drink; POD 3: 1500 mls of protein drink, continued until POD 7. Compared to Parenteral Nutrition (glucose, amino acids and lipids) until POD 7. PN was commenced within 24 h of completion of surgery. | Both groups received early protein.                                                                                                                        |
| Xu <sup>43</sup><br>2012   | Postoperative colorectal cancer | <b>Water</b> was began within 6 hours after surgery, <b>enteral nutrition</b> was started on POD 1.                                                                                                                                                                                                                 | Mortality not explicitly reported.                                                                                                                         |
| Yang <sup>44</sup><br>2013 | Postoperative colorectal cancer | Oral intake of 30ml to 50ml <b>Ensure (US Abbott)</b> 6 to 12 hours post-surgery at 1- to 2-hours intervals. Progressed to 100ml to 200ml Ensure at 2- to 3- hours intervals on POD 2. POD 3 to 4; started with liquid diet and gradually changed to a regular diet .                                               | Mortality not explicitly reported.                                                                                                                         |
| Zhou <sup>45</sup><br>2006 | Colorectostomy.                 | Early feeding patients were provided immediately <b>water</b> and gradually to a <b>liquid fiberless diet</b> after one day, and a <b>semi-liquid fiber diet</b> after three days. Control patients commenced nutrition after passage of flatus.                                                                    | Mortality not explicitly reported. Early protein <i>possible</i> , but not explicit in protocol. Protein content of 'liquid fiberless diet' not described. |

**CNKI:** Identified by searching China National Knowledge Infrastructure, **EN:** enteral nutrition, **PN:** refers to a parenteral nutrition solution containing protein.

eFigure 1. Risk of bias summary figure.

| Study                | Allocation concealment | Use of any form of blinding | Incomplete outcome data (loss to follow-up exceeds 10%) | Sequence generation* | Reporting bias** |
|----------------------|------------------------|-----------------------------|---------------------------------------------------------|----------------------|------------------|
| Beier-Holgersen 1996 | ●                      | ●                           | ●                                                       | ●                    | ●                |
| Carr 1996            | ●                      | ●                           | ●                                                       | ●                    | ●                |
| Lau 2014             | ●                      | ●                           | ●                                                       | ●                    | ●                |
| Minig 2009           | ●                      | ●                           | ●                                                       | ●                    | ●                |
| Mulrooney 2005       | ●                      | ●                           | ●                                                       | ●                    | ●                |
| Ortiz 1996           | ●                      | ●                           | ●                                                       | ●                    | ●                |
| Shen 2013            | ●                      | ●                           | ●                                                       | ●                    | ●                |
| Stewart 1998         | ●                      | ●                           | ●                                                       | ●                    | ●                |

- Low risk of bias
- Unclear risk of bias
- High risk of bias

\* Complete reporting of Sequence generation procedures helps improve confidence the study is not at high risk of selection bias and should be interpreted in context of Allocation concealment.

\*\* Selective reporting is best interpreted in the context of an a priori published study Protocol. No studies reported publicly available a priori published Protocols.

eFigure 2. Funnel plot for publication bias. Primary outcome (mortality).

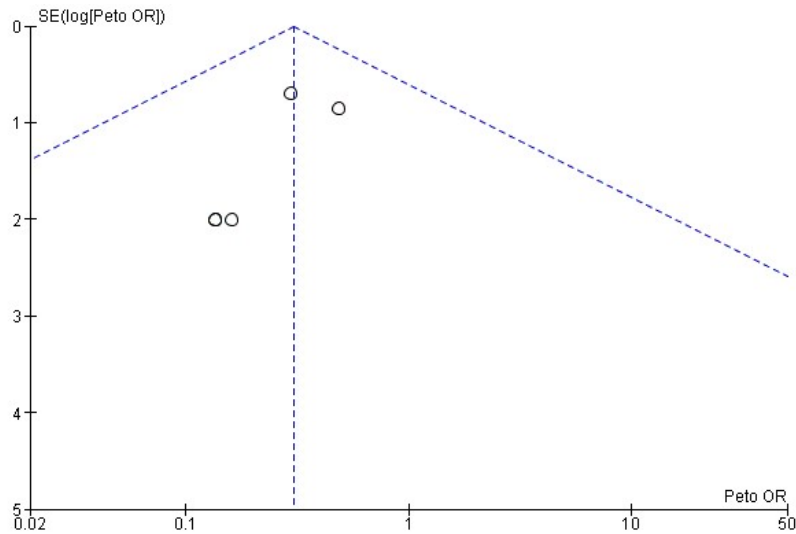

eFigure 3: Duration of hospital stay

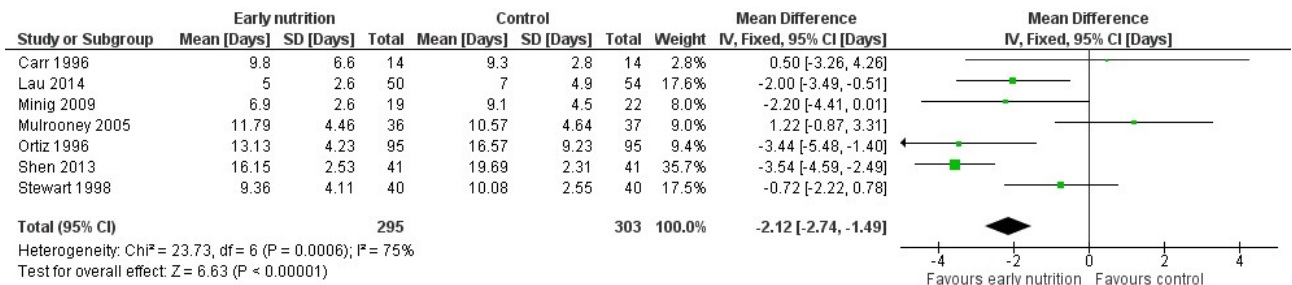

eFigure 4: Need for ICU admission

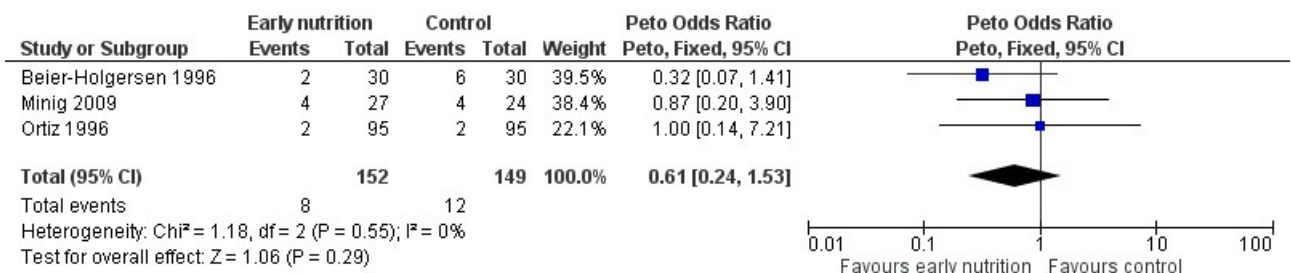

eFigure 5: Anastomotic leak/dehiscence

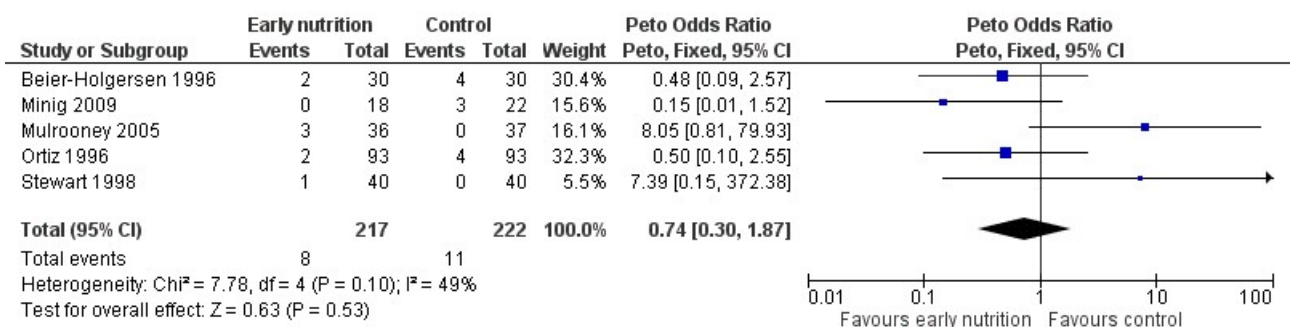

**eFigure 6: Postoperative nausea and vomiting**

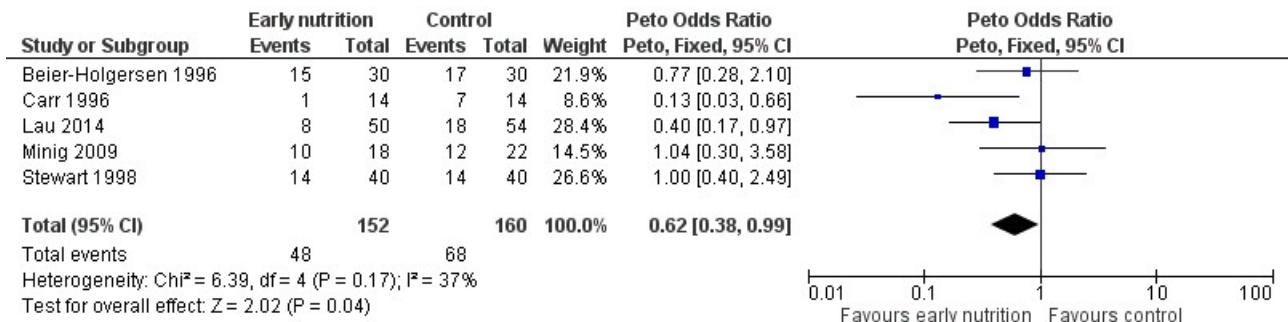

**eFigure 7: Pneumonia**

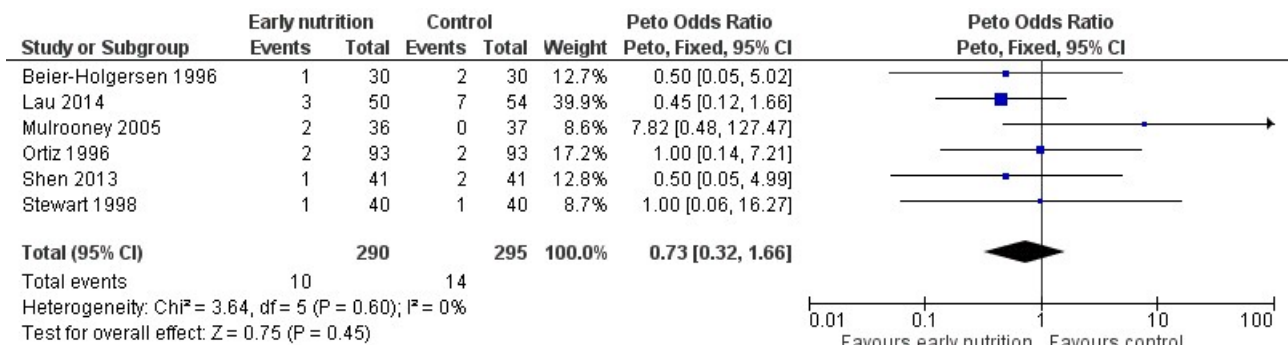

**eFigure 8: Need for re-operation**

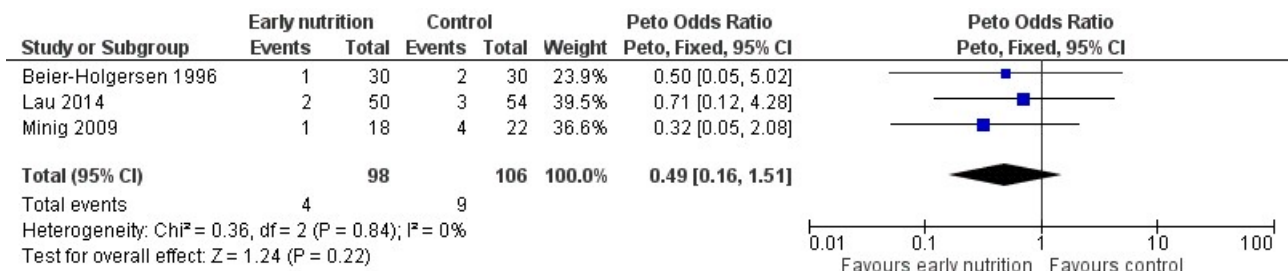

**eFigure 9: Number of patients with intra-abdominal abscess/peritonitis**

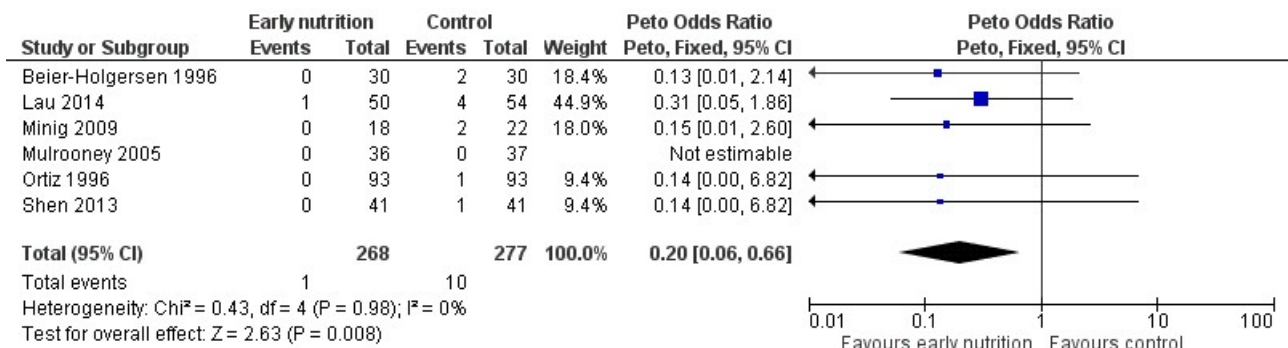

**eFigure 10: Number of patients with serious post-operative complications**

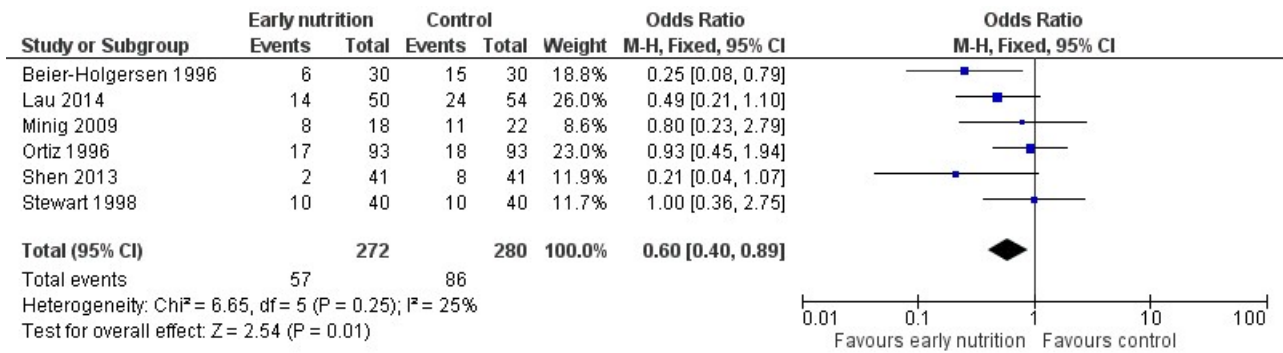

**eFigure 11: Number of patients with a post-operative infection**

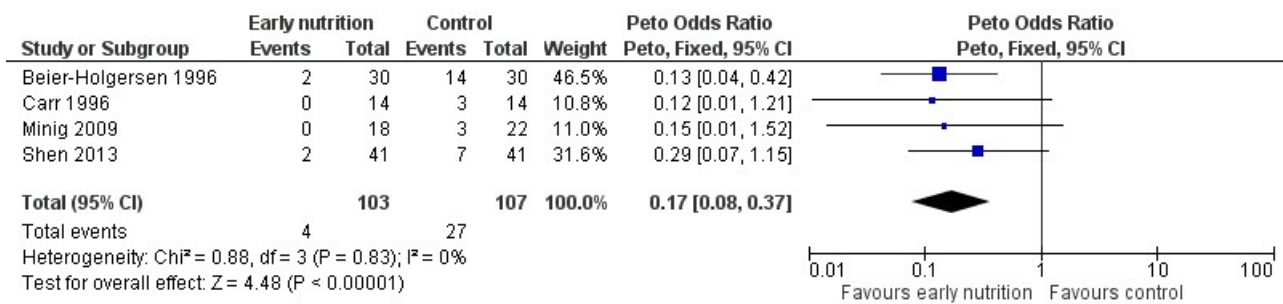

eFigure 12: Stratified analysis of duration of hospital stay

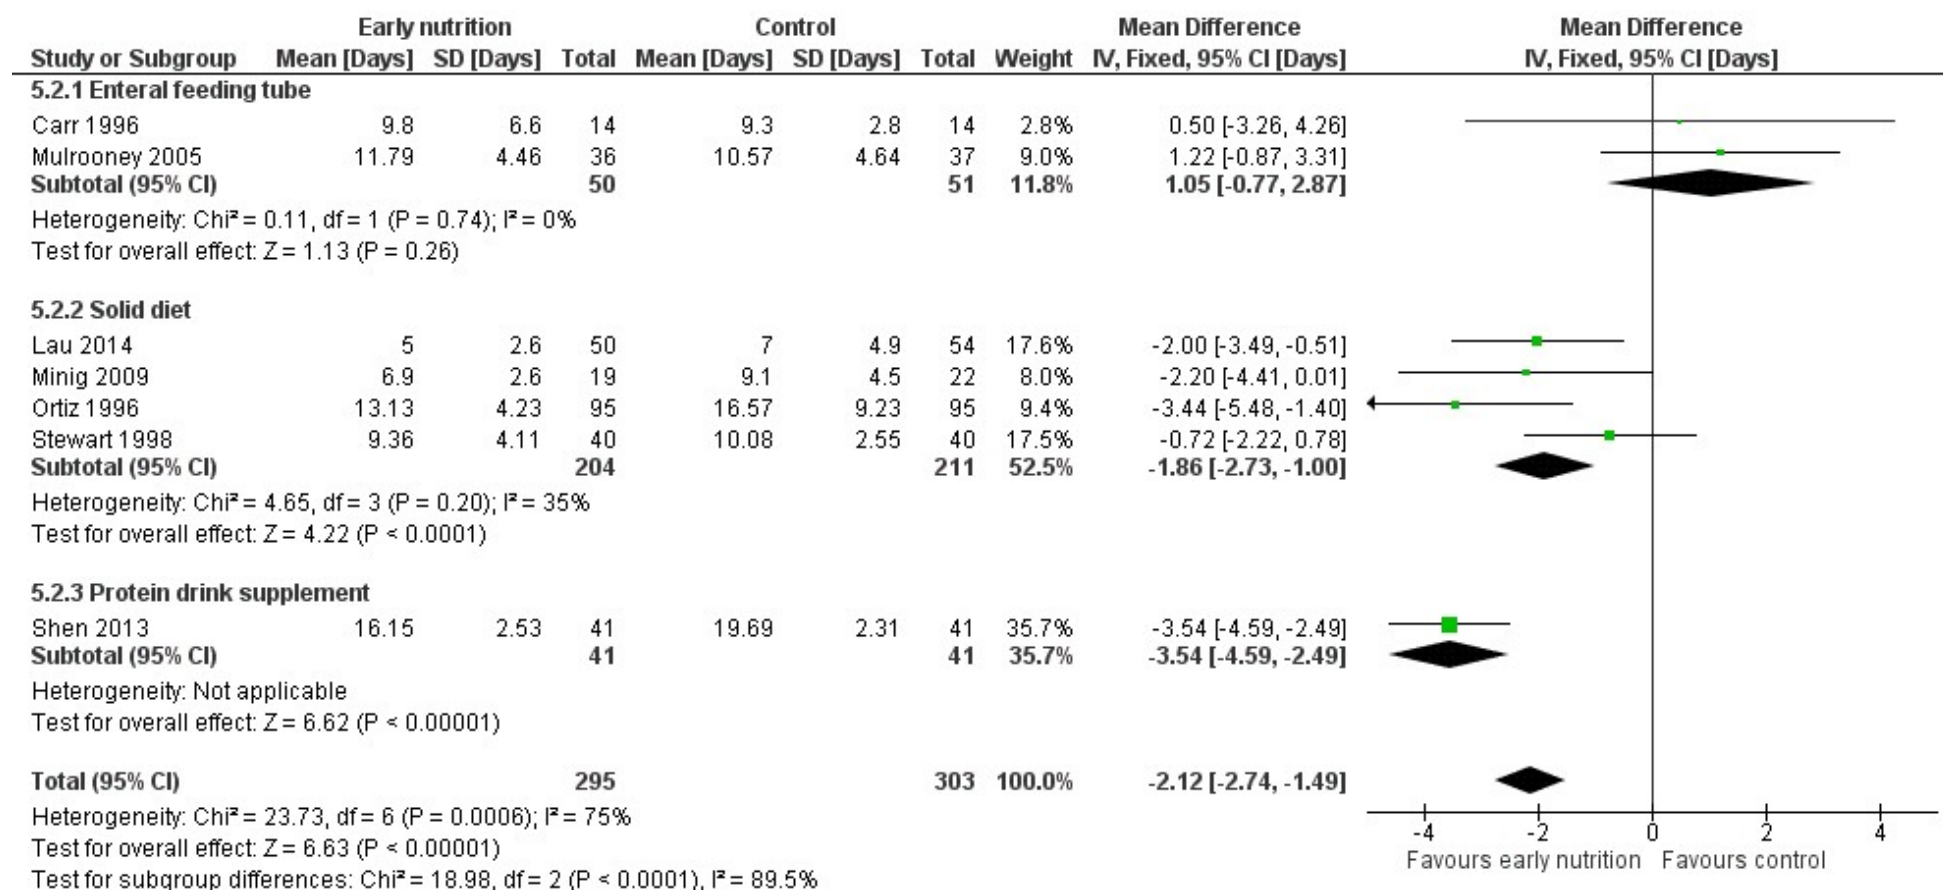



## Reference List

1. Boelens PG, Houdijk APJ, Fonk JCM et al. Glutamine-enriched enteral nutrition increases HLA-DR expression on monocytes of trauma patients. *Journal of Nutrition* 2002;132(9):2580-2586.
2. Behrns KE, Kircher AP, Galanko JA, Brownstein MR, Koruda MJ. Prospective randomized trial of early initiation and hospital discharge on a liquid diet following elective intestinal surgery. *J Gastrointest Surg* 2000;4(2):217-221.
3. Binderow SR, Cohen SM, Wexner SD, Nogueras JJ. Must early postoperative oral intake be limited to laparoscopy? *Dis Colon Rectum* 1994;37(6):584-589.
4. Cao A. Application of early intestinal nutrition after colon and rectal cancer. *Today Nurse* 2009;9:42-43.
5. Chatterjee S, Bala SK, Chakraborty P et al. A comparative study between early enteral feeding (within 24 hours) versus conventional enteral feeding after enteric anastomosis. *Bangladesh Journal of Medical Science* 2012;11(4):273-283.
6. Chen J, Wuo W. Effect of early oral enteral nutrition on postoperative immune function and quality of life in patients with colorectal cancer. *Chin J General Surg* 2015;24(12):1774-1777.
7. Chen M, Cui H, Chen Y, Jai G. Clinical study on early postoperative feeding of colorectal cancer. *J Pract Oncology* 2010;25(4):453-454.
8. da Fonseca LM, Profeta da Luz MM, Lacerda-Filho A, Correia MI, Gomes da SR. A simplified rehabilitation program for patients undergoing elective colonic surgery--randomized controlled clinical trial. *Int J Colorectal Dis* 2011;26(5):609-616.
9. Dag A, Colak T, Turkmenoglu O, Gundogdu R, Aydin S. A randomized controlled trial evaluating early versus traditional oral feeding after colorectal surgery. *Clinics (Sao Paulo)* 2011;66(12):2001-2005.
10. Delaney CP, Zutshi M, Senagore AJ, Remzi FH, Hammel J, Fazio VW. Prospective, randomized, controlled trial between a pathway of controlled rehabilitation with early ambulation and diet and traditional postoperative care after laparotomy and intestinal resection. *Dis Colon Rectum* 2003;46(7):851-859.
11. El NA, Fikry A, El MT et al. Early oral feeding in patients undergoing elective colonic anastomosis. *Int J Surg* 2009;7(3):206-209.
12. Feo CV, Romanini B, Sortini D et al. Early oral feeding after colorectal resection: a randomized controlled study. *ANZ J Surg* 2004;74(5):298-301.
13. Han L. Patients with colorectal cancer do not have a nasogastric tube before surgery and eat early: Clinical study. *Journal of Tianjin Medical University* 2012;18(3):118-120.
14. Han-Geurts IJ, Jeekel J, Tilanus HW, Brouwer KJ. Randomized clinical trial of patient-controlled versus fixed regimen feeding after elective abdominal surgery. *Br J Surg* 2001;88(12):1578-1582.
15. Han-Geurts IJ, Hop WC, Kok NF, Lim A, Brouwer KJ, Jeekel J. Randomized clinical trial of the impact of early enteral feeding on postoperative ileus and recovery. *Br J Surg* 2007;94(5):555-561.
16. Hartsell PA, Frazee RC, Harrison JB, Smith RW. Early postoperative feeding after elective colorectal surgery. *Arch Surg* 1997;132(5):518-520.

17. He Q. Effect of early postoperative oral enteral nutrition on postoperative immunity and intestinal mucosal barrier in patients with colorectal cancer. *Chin J Trad West Med Dig* 2016;24(4):292-294.
18. Hoover HC, Jr., Ryan JA, Anderson EJ, Fischer JE. Nutritional benefits of immediate postoperative jejunal feeding of an elemental diet. *Am J Surg* 1980;139(1):153-159.
19. Kemen M, Senkal M, Homann HH et al. Early postoperative enteral nutrition with arginine-omega-3 fatty acids and ribonucleic acid-supplemented diet versus placebo in cancer patients: an immunologic evaluation of Impact. *Crit Care Med* 1995;23(4):652-659.
20. Lee TG, Kang SB, Kim DW, Hong S, Heo SC, Park KJ. Comparison of early mobilization and diet rehabilitation program with conventional care after laparoscopic colon surgery: a prospective randomized controlled trial. *Dis Colon Rectum* 2011;54(1):21-28.
21. Li Y, Wu X, Luo W, Zhang M, Huang X, Wu L. The study of clinical application of early postoperative enteral nutrition after colectomy. *West China Medical Journal* 2006;21(1):26-27.
22. Lidder P, Thomas S, Fleming S, Hosie K, Shaw S, Lewis S. A randomized placebo controlled trial of preoperative carbohydrate drinks and early postoperative nutritional supplement drinks in colorectal surgery. *Colorectal Dis* 2013;15(6):737-745.
23. Lucha PA, Jr., Butler R, Plichta J, Francis M. The economic impact of early enteral feeding in gastrointestinal surgery: a prospective survey of 51 consecutive patients. *Am Surg* 2005;71(3):187-190.
24. MacFie J, Woodcock NP, Palmer MD, Walker A, Townsend S, Mitchell CJ. Oral dietary supplements in pre- and postoperative surgical patients: A prospective and randomized clinical trial. *Nutrition* 2019;16:723-728.
25. Nematihonar B, Salimi S, Noorian V, Samsami M. Early Versus Delayed (Traditional) Postoperative Oral Feeding in Patients Undergoing Colorectal Anastomosis. *Adv Biomed Res* 2018;7:30.:30.
26. Nessim A, Wexner SD, Agachan F et al. Is bowel confinement necessary after anorectal reconstructive surgery? A prospective, randomized, surgeon-blinded trial. *Dis Colon Rectum* 1999;42(1):16-23.
27. Reissman P, Teoh TA, Cohen SM, Weiss EG, Noguera JJ, Wexner SD. Is early oral feeding safe after elective colorectal surgery? A prospective randomized trial. *Ann Surg* 1995;222(1):73-77.
28. Pragatheeswarane M, Muthukumarassamy R, Kadambari D, Kate V. Early oral feeding vs. traditional feeding in patients undergoing elective open bowel surgery-a randomized controlled trial. *J Gastrointest Surg* 2014;18(5):1017-1023.
29. Qu Q, Shi W, Li H. Effect of early oral feeding on postoperative recovery of patients with colorectal cancer. *Chinese Journal of Gerontology* 2012;2041-2043.
30. Ren H. Application value of early postoperative oral enteral nutrition in patients with colorectal cancer. *The Practical Journal of Cancer* 2014;29(10):1226-1228.
31. Ryan JA, Jr., Page CP, Babcock L. Early postoperative jejunal feeding of elemental diet in gastrointestinal surgery. *Am Surg* 1981;47(9):393-403.
32. Sagar S, Harland P, Shields R. Early postoperative feeding with elemental diet. *Br Med J* 1979;1(6159):293-295.

33. Sharma M, Wahed S, O'Dair G, Gemmell L, Hainsworth P, Horgan AF. A randomized controlled trial comparing a standard postoperative diet with low-volume high-calorie oral supplements following colorectal surgery. *Colorectal Dis* 2013;15(7):885-891.
34. Schroeder D, Gillanders L, Mahr K, Hill GL. Effects of immediate postoperative enteral nutrition on body composition, muscle function, and wound healing. *Journal of Parenteral & Enteral Nutrition* 1991;15(4):376-383.
35. Smedley F, Bowling T, James M et al. Randomized clinical trial of the effects of preoperative and postoperative oral nutritional supplements on clinical course and cost of care. *Br J Surg* 2004;91(8):983-990.
36. Soliani P, Dell'Abate P, Del RP et al. [Early enteral nutrition in patients treated with major surgery of the abdomen and the pelvis]. *Chir Ital* 2001;53(5):619-632.
37. Wang D, Zhong B, Zhao P, Liu X, Zhou Y. Effects of early enteral feeding on clinical outcomes and immune function in patients after colorectal cancer surgery. *Chin J General Surg* 2015;30(1):38-41.
38. Wang Z, Shong B, Xiang J, Zhou Y, Wang D. Effect of early oral enteral nutrition on clinical outcomes after colorectal cancer surgery. *Chin J Gastrointest Surg* 2013;16(8):735-738.
39. Wu GH, Zhang YW, Pan HT, Zhang B, Liu ZH, Wu ZH. A randomized controlled trial of postoperative artificial nutrition in malnourished patients with gastrointestinal cancer. *Chin J Gastrointest Surg* 2007;10(6):546-549.
40. Wu GH, Jin DY, Wu ZH, Huang DX, Wu ZG. Study on the efficacy and safety of intestinal nutrition in the early stage after gastrointestinal surgery. *Parenteral and Enteral Nutrition (China)* 1996;3(2):86-87.
41. Wu GH, Zhang YW, Wu ZH. Study on the nutritional efficacy of the intestines in the early stage after the surgery of the digestive tract tumor. *China Journal of Clinical Nutrition* 2000;8(1):56.
42. Wu K, Ma J, Wang L. Clinical utility of postoperative early enteral nutrition after laparoscopic radical resection for colorectal cancer. *J Dig Oncol* 2012;4(3):180-182.
43. Xu L, Wan Z, Guo J et al. Influence of early oral feeding on serum albumin and inflammatory cytokines after rectal cancer surgery. *J Clin Surg* 2012;20(4):244-246.
44. Yang D, He W, Wang L et al. Effect of postoperative early enteral nutrition on the recovery of humoral immune function in patients with colorectal carcinoma undergoing elective resection. *Chin J Gastrointest Surg* 2013;6(11):1051-1054.
45. Zhou T, Wu XT, Zhou YJ, Huang X, Fan W, Li YC. Early removing gastrointestinal decompression and early oral feeding improve patients' rehabilitation after colectomy. *World J Gastroenterol* 2006;12(15):2459-2463.

< ----- last page----- >
